# Supplementary material for: Study of Anharmonicity in Zirconium Hydrides Using Inelastic Neutron Scattering and Ab-Initio Computer Modeling
Source: MDPI journal article supplement (doi:10.3390/inorganics9050029), 2021-04-21
Supplement: s1 [file s1]

# Supplementary Materials: Study of anharmonicity in Zirconium Hydrides using inelastic neutron scattering and ab-initio computer modeling

Jiayong Zhang <sup>1,2</sup> , Yongqiang Cheng <sup>2</sup> , Alexander I. Kolesnikov <sup>2</sup> , Jerry Bernholc <sup>1,3</sup> , Wenchang Lu <sup>1,3</sup> , Anibal J. Ramirez-Cuesta <sup>2,\*</sup> 

## 1. Eigen states based on 2D Schrödinger equation

We have sampled 2D potential energy surfaces of all three materials and solved the according Schrödinger equations as shown in Eq. 2 in the original article. The eigenstates with the lowest 15 energies, which represent the wavefunctions of the single hydrogen/deuterium atom, are plotted in Fig. S1. The black texts above the green background are indicating eigenfrequencies in meV, and areas in blue/red are wavefunctions.

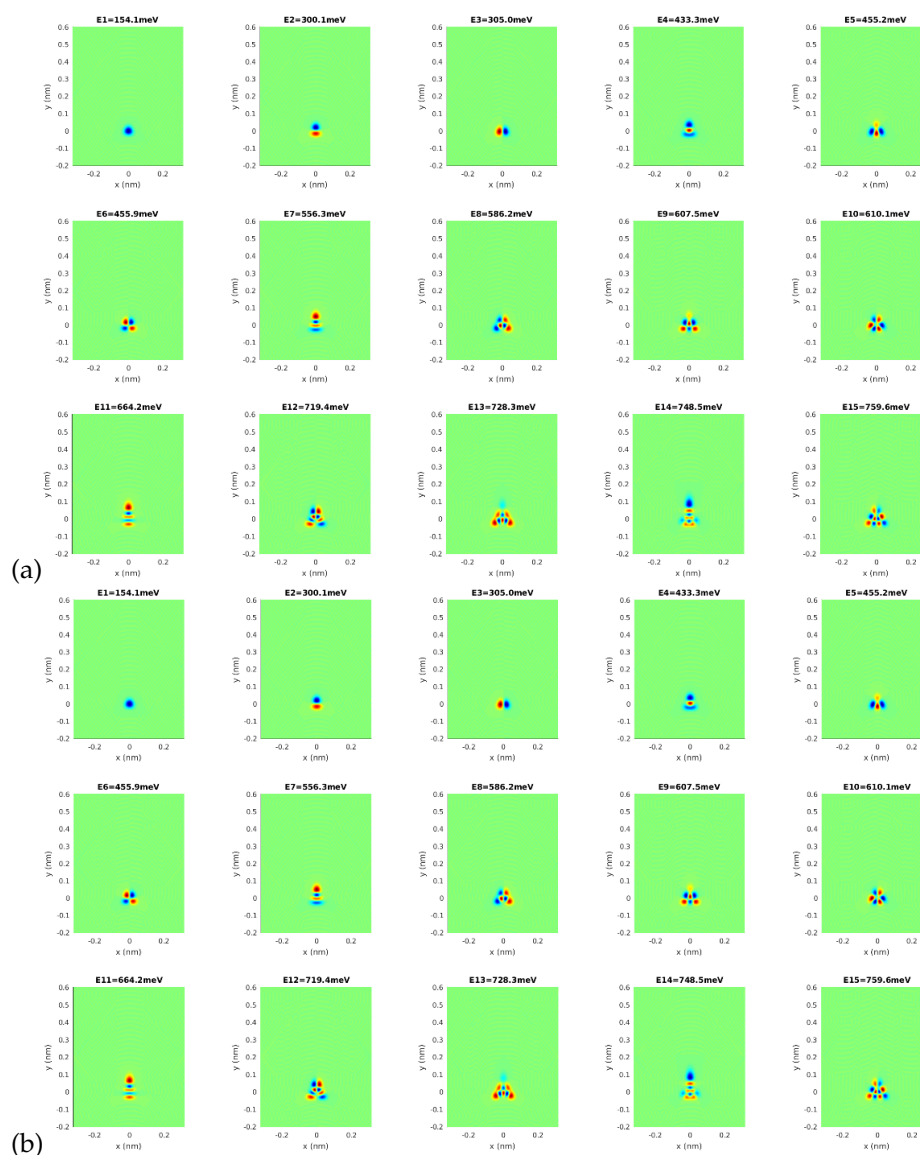

Figure S1. Cont.

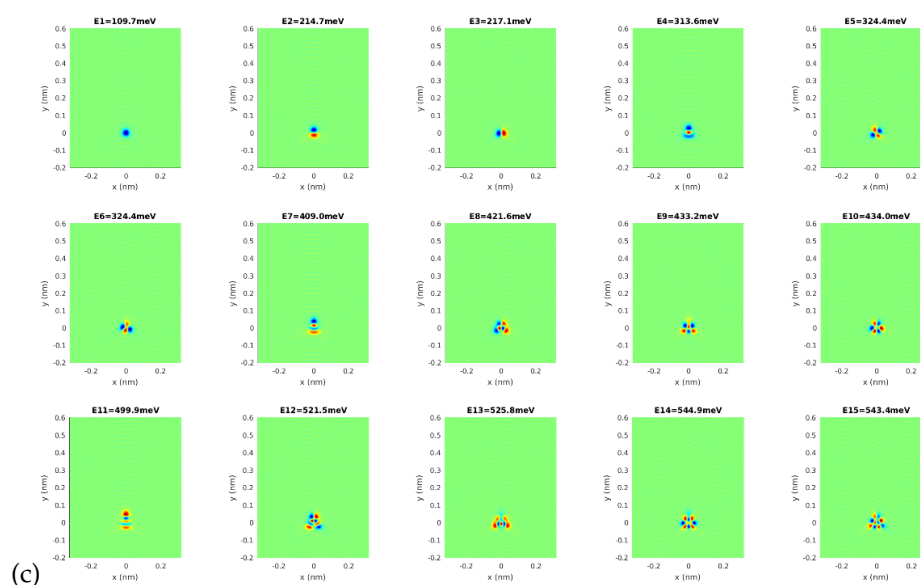

**Figure S1.** First fifteen eigenfrequencies and wavefunctions of H(D) for: (a) (112) plane of  $\epsilon$ -ZrH<sub>2</sub>, (b) (-112) plane of ZrH, and (c) (-112) plane of ZrD.

## 2. Comparisons of eigenfrequencies between ZrH<sub>x</sub>

Based on the eigenfrequencies in Fig. S1 (and more not plotted), we plot in Fig. S2 the differences of eigenfrequencies below 1000 meV for three materials.

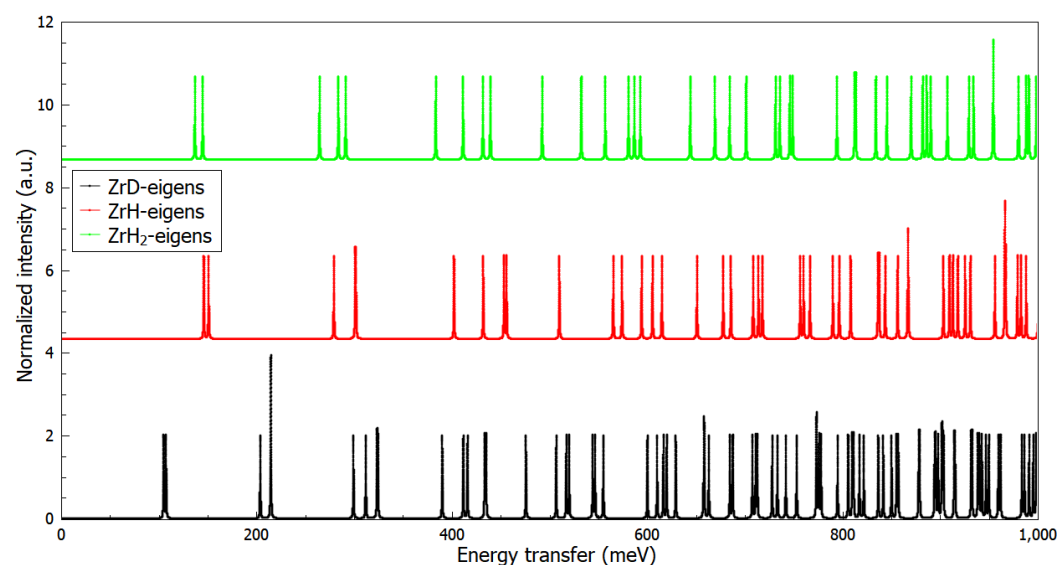

**Figure S2.** Comparisons of eigenfrequencies by solving Schrödinger equations for ZrH<sub>x</sub> in the energy range below 1000 meV.

## 3. The probability distribution of H atoms in ZrH<sub>2</sub>

According to quantum theory, the probability distribution of a particle is the modulus square of the particle's wavefunctions:

$$\rho(\mathbf{r}) = c|\psi(\mathbf{r})|^2 \quad (1)$$

where  $c$  is the normalization factor. To quantitatively obtain the spatial distribution of the hydrogen atom, the (unnormalized) probability distributions of hydrogen in (112) plane along  $x$  and  $y$  directions (with  $y=0$  and  $x=0$ , respectively) in ZrH<sub>2</sub> are plotted in Fig. S3. The dashed lines are indicating the full width at half maximum.

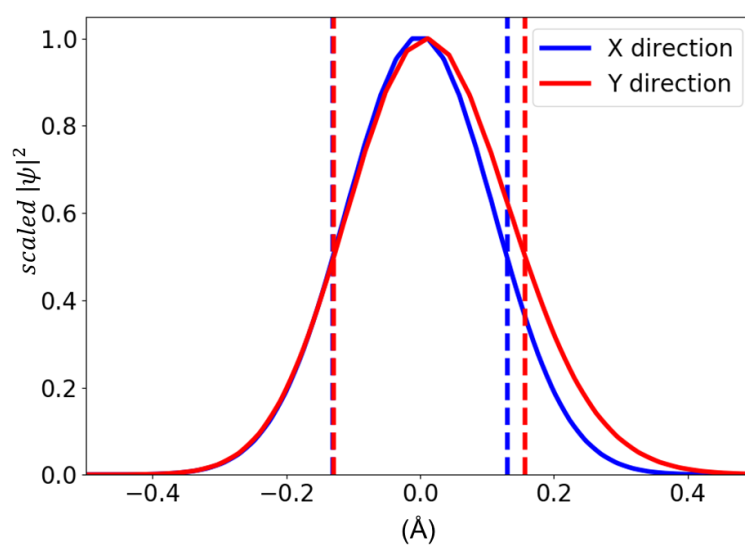

**Figure S3.** Unnormalized probability distributions of H atom in ZrH<sub>2</sub> in (112) plane along x (blue) and y (red) directions, where the dashed lines are indicating full width at half maximum (FWHM).
